# Supplementary material for: Synthesis, characterization and NLO properties of 1,4-phenylenediamine-based Schiff bases: a combined theoretical and experimental approach
Source: Royal Society of Chemistry journal article supplement (doi:10.1039/d3ra07642c), 2024-01-01
Supplement: d3ra07642c1.pdf [file d3ra07642c1.pdf]

## **Synthesis, Characterization and NLO Properties of 1,4-phenylenediamine Based Schiff's Bases: A Combined Theoretical and Experimental Approach**

Muhammad Tahir,<sup>a</sup> Hina Aftab,<sup>a</sup> Iqra Shafiq,<sup>b,c</sup> Muhammad Khalid,<sup>\*b,c</sup> Saadia Haq,<sup>b,c</sup> Attalla F. El-kott,<sup>d,e</sup> Mohamed Abdellatif Zein<sup>f,g</sup>, Umme-Hani<sup>b,c</sup> and Zahid Shafiq<sup>\*a</sup>

<sup>a</sup>*Institute of Chemical Sciences, Bahauddin Zakariya University, Multan 60800, Pakistan*

<sup>b</sup>*Institute of Chemistry, Khwaja Fareed University of Engineering & Information Technology, Rahim Yar Khan, 64200, Pakistan*

<sup>c</sup>*Centre for Theoretical and Computational Research, Khwaja Fareed University of Engineering & Information Technology, Rahim Yar Khan, 64200, Pakistan*

<sup>d</sup>*Biology Department, College of Science, King Khalid University, Abha, Saudi Arabia.*

<sup>e</sup>*Zoology Department, College of Science, Damanhour University, Egypt*

<sup>f</sup>*Chemistry Department, University College of AlWajh, University of Tabuk, Tabuk, Saudi Arabia*

<sup>g</sup>*Chemistry Department, Faculty of Science, Damanhour University, Egypt*

### **Corresponding Authors**

Prof. Dr. Zahid Shafiq: [zahidshafiq@bzu.edu.pk](mailto:zahidshafiq@bzu.edu.pk)

Dr. Muhammad Khalid: [khalid@iq.usp.br](mailto:khalid@iq.usp.br); [muhammad.khalid@kfueit.edu.pk](mailto:muhammad.khalid@kfueit.edu.pk)

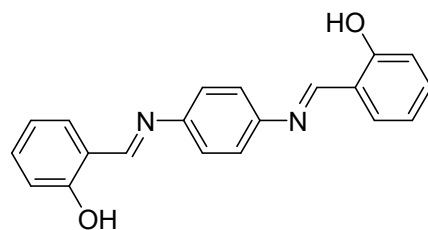

(3a)

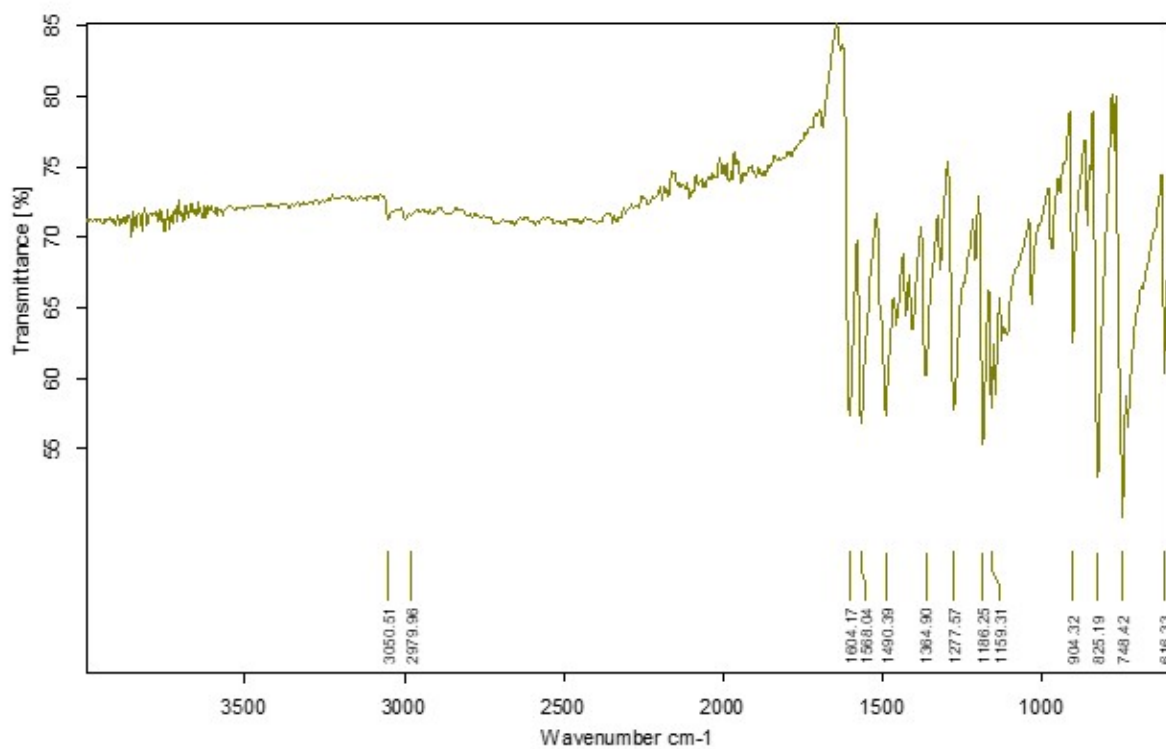

Figure S1: FT- IR spectrum of 3a compound

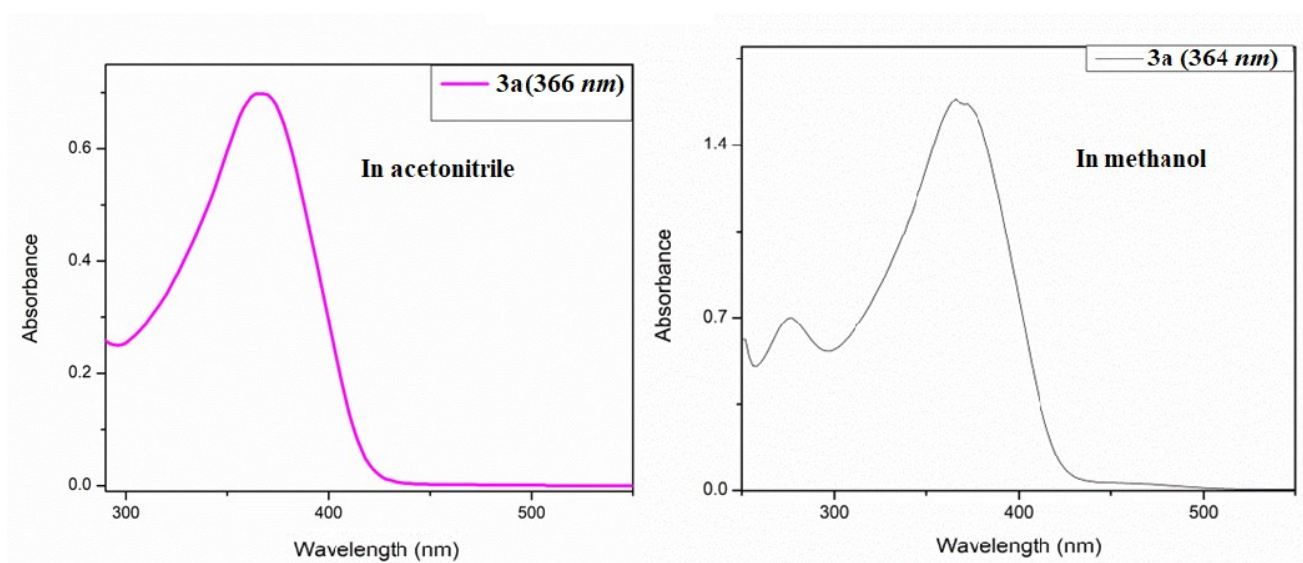

Figure S2: UV-Vis spectra of 3a in various media

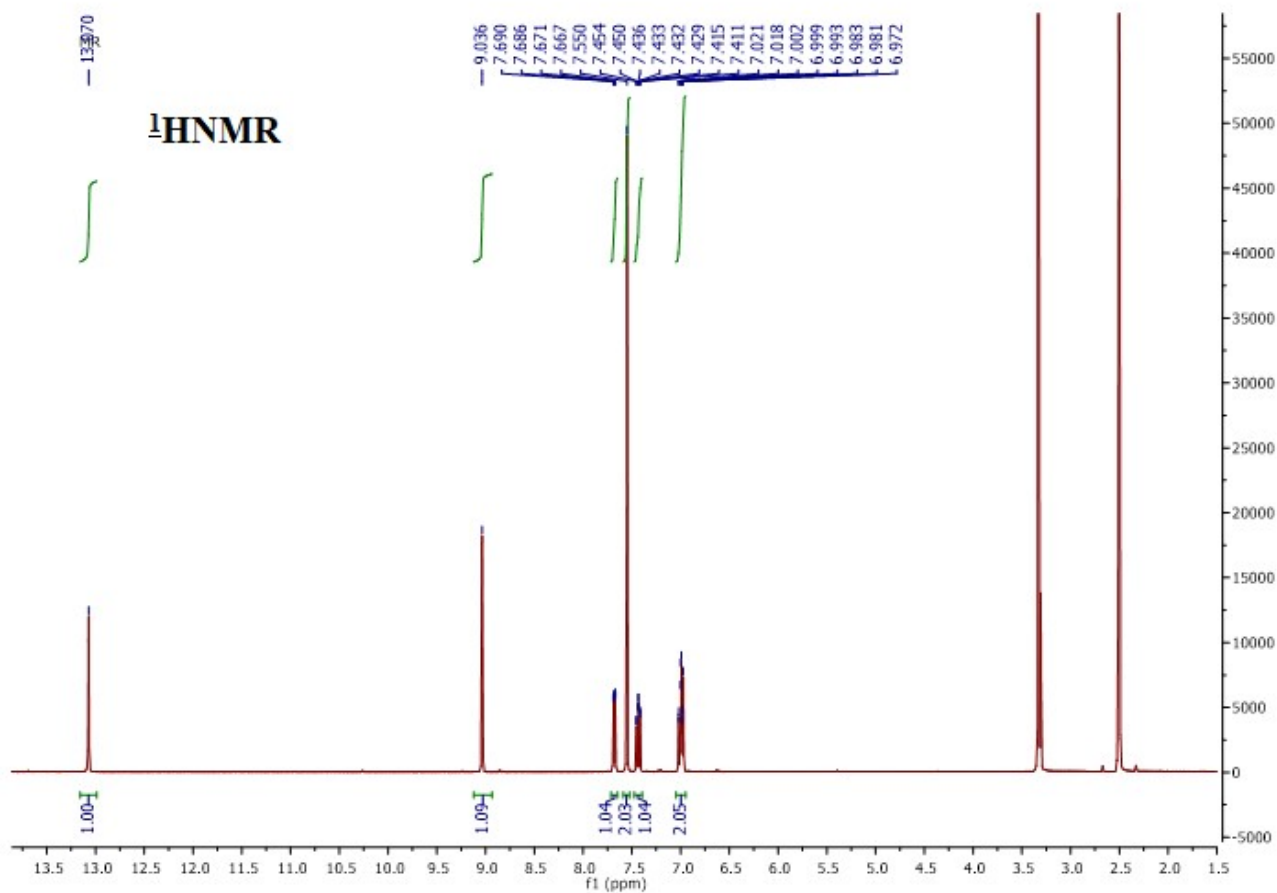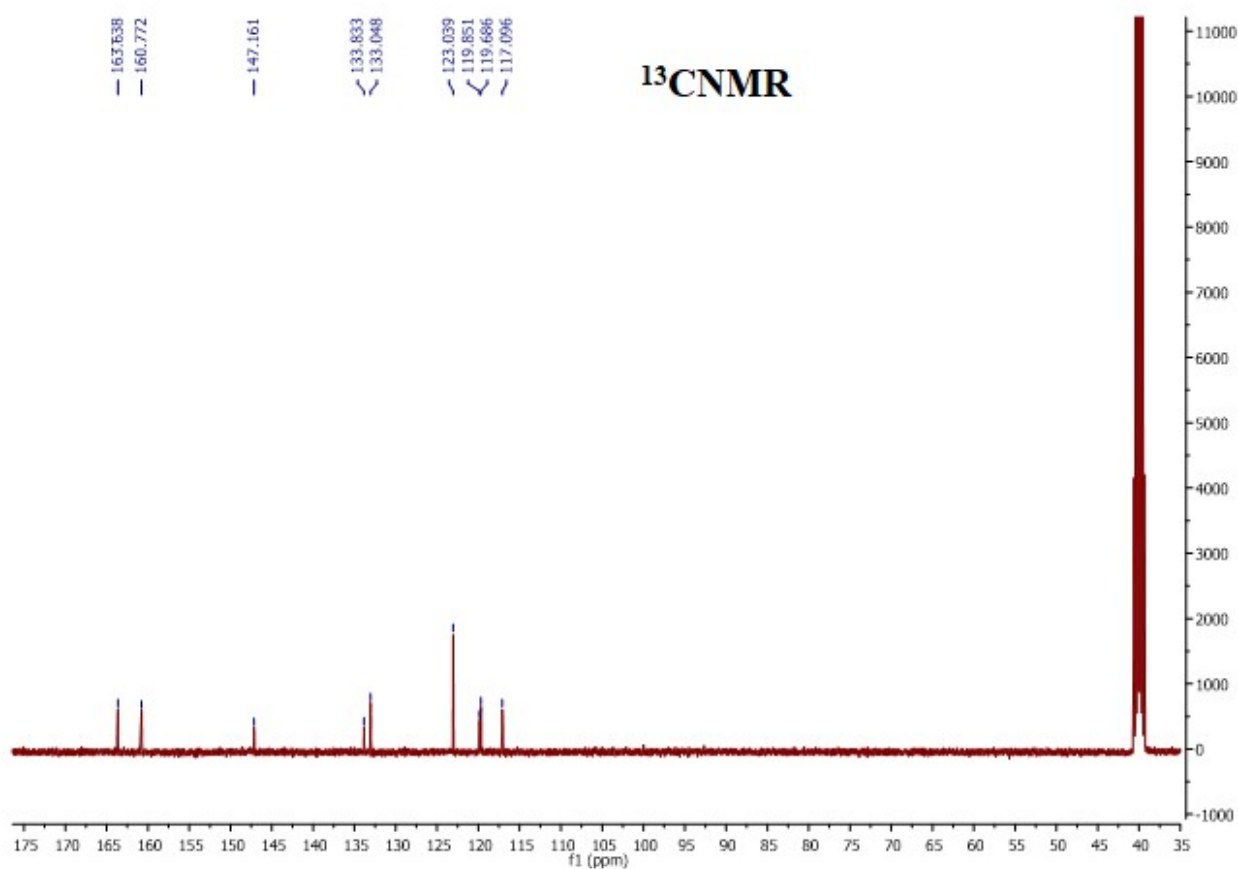

**Figure S3:**  $^1\text{H NMR}$  and  $^{13}\text{C NMR}$  spectral representation of **3a** compound

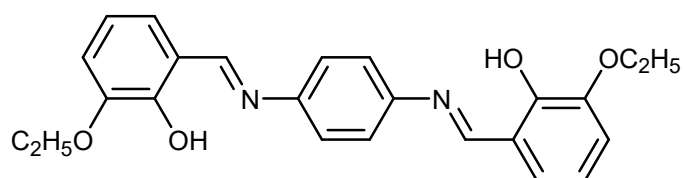

(3b)

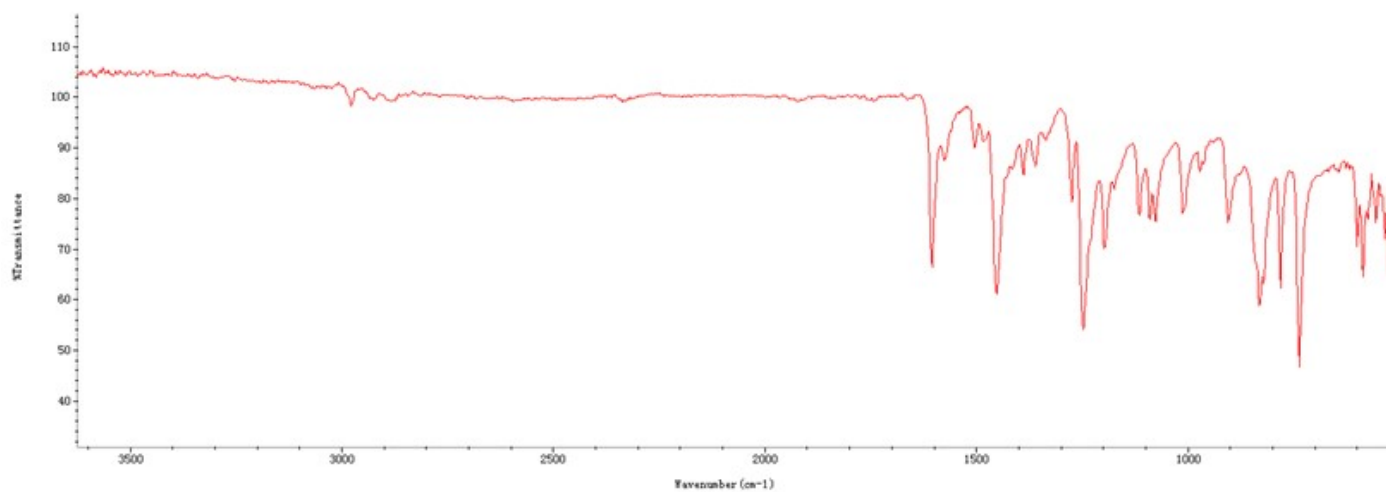

Figure S4: FT- IR spectrum of **3b** compound

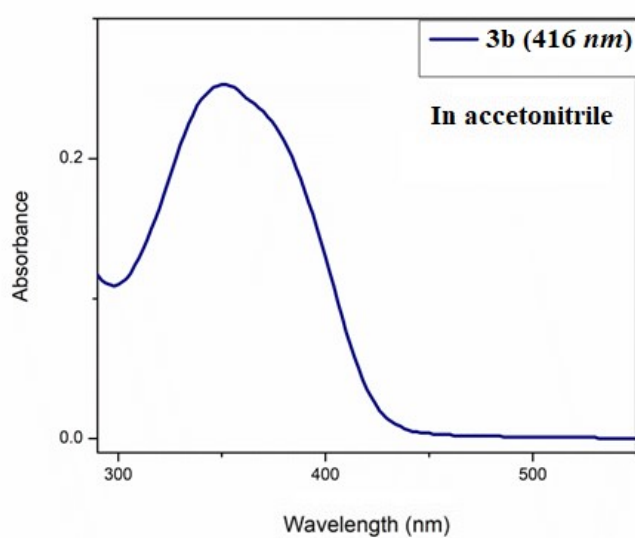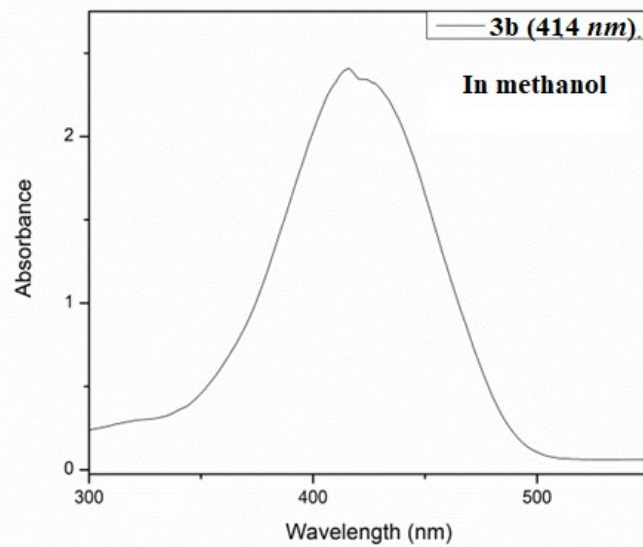

Figure S5: UV-Vis spectra of **3b** in various media

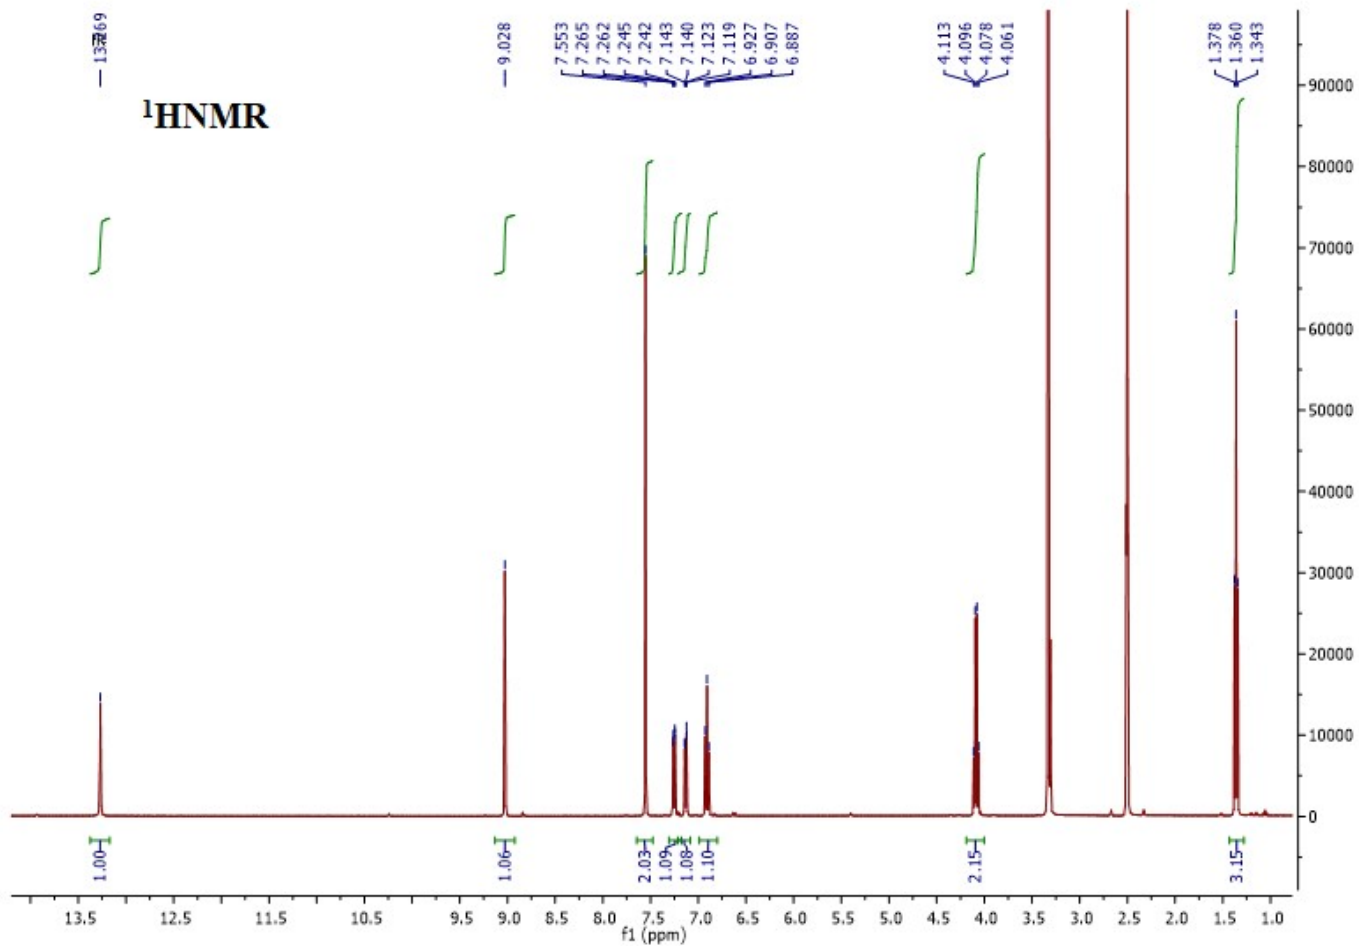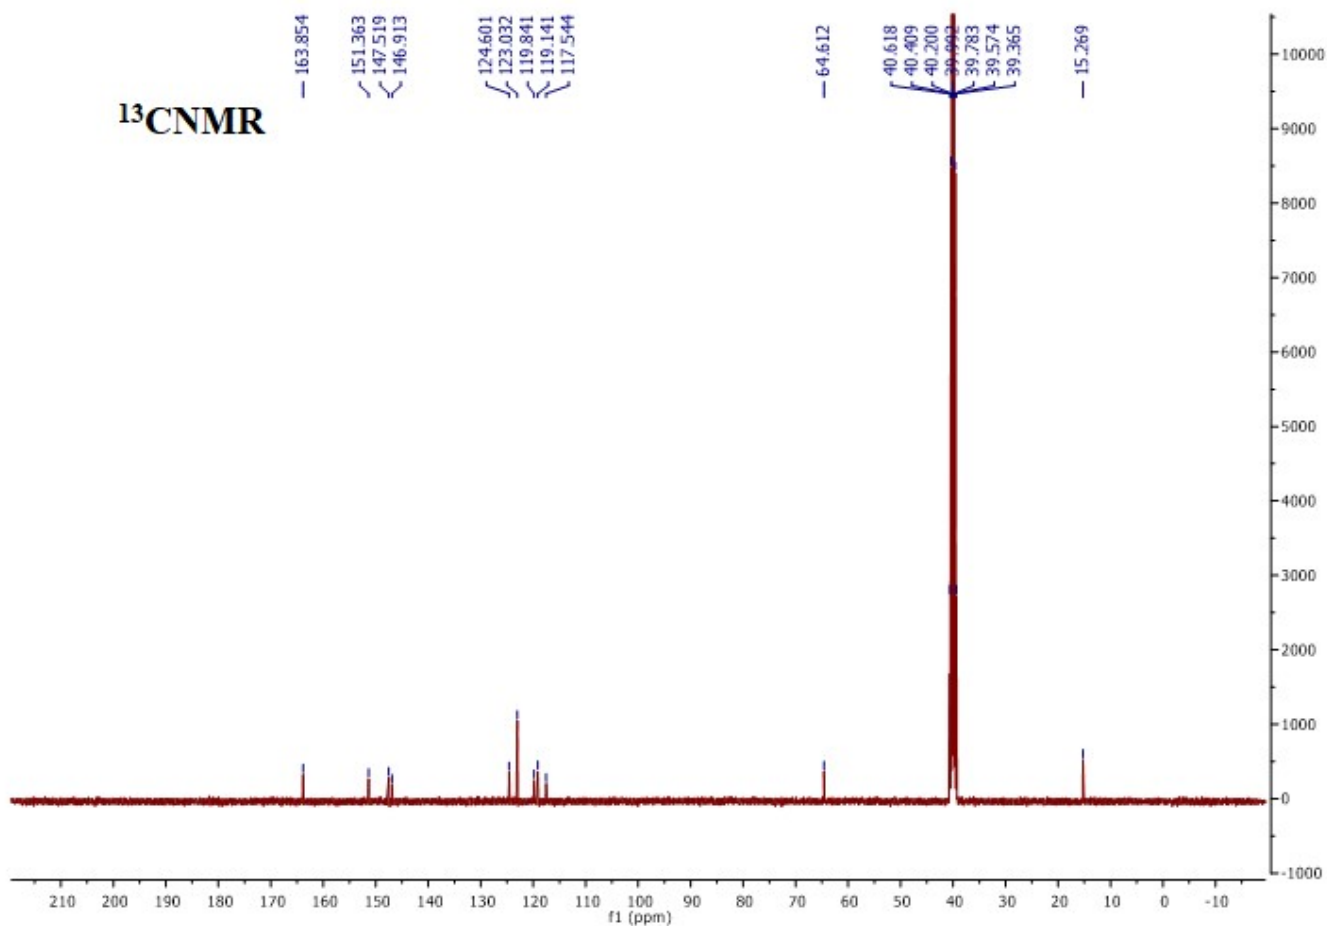

**Figure S6:**  $^1\text{H}$ NMR and  $^{13}\text{C}$ NMR spectral representation of **3b** compound

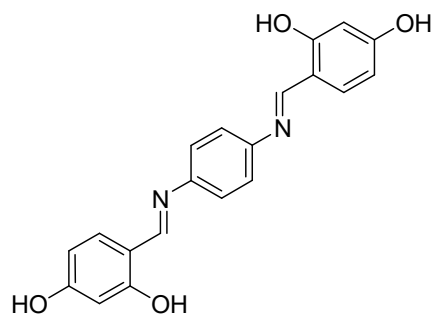

**(3c)**

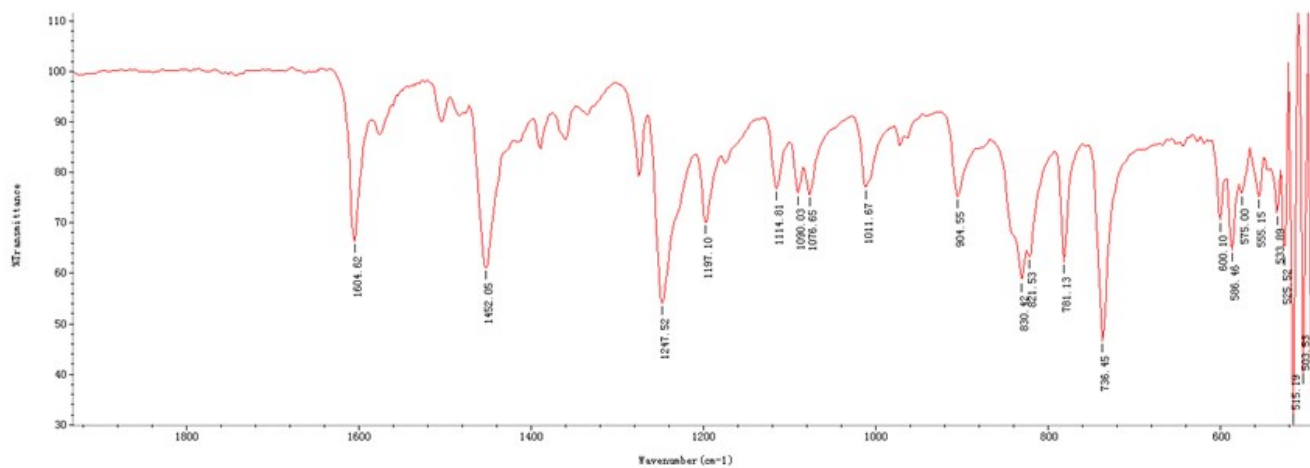

**Figure S7:** FT- IR spectral representation of **3c** compound

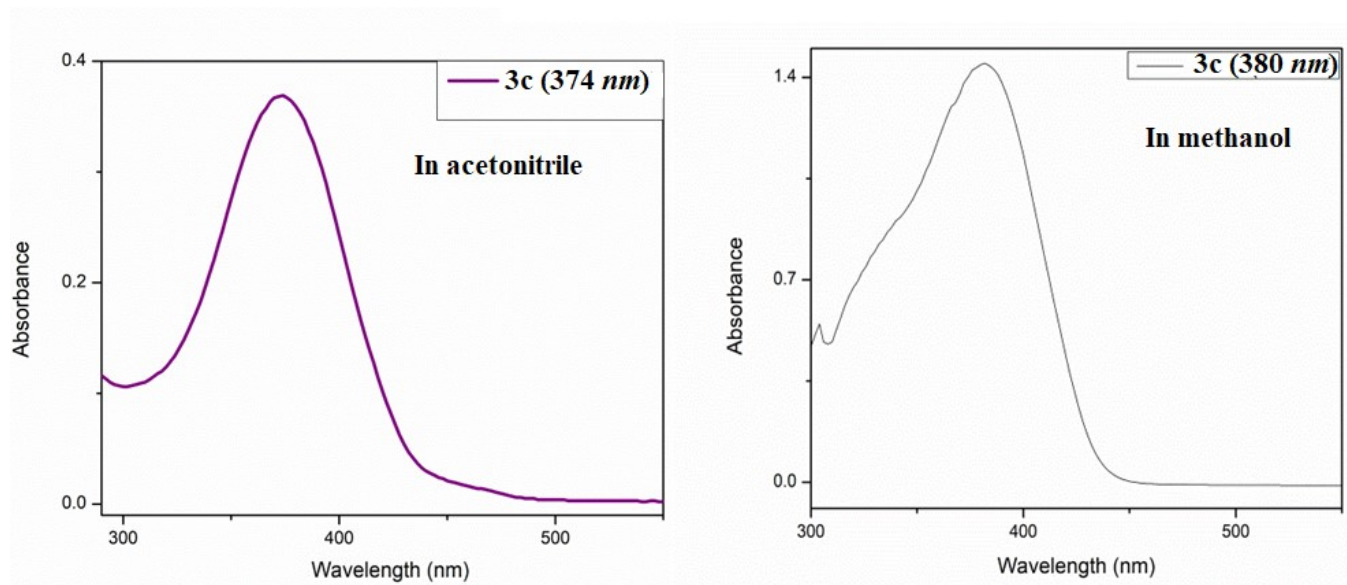

**Figure S8:** UV-Vis spectral representation of **3c** in various media

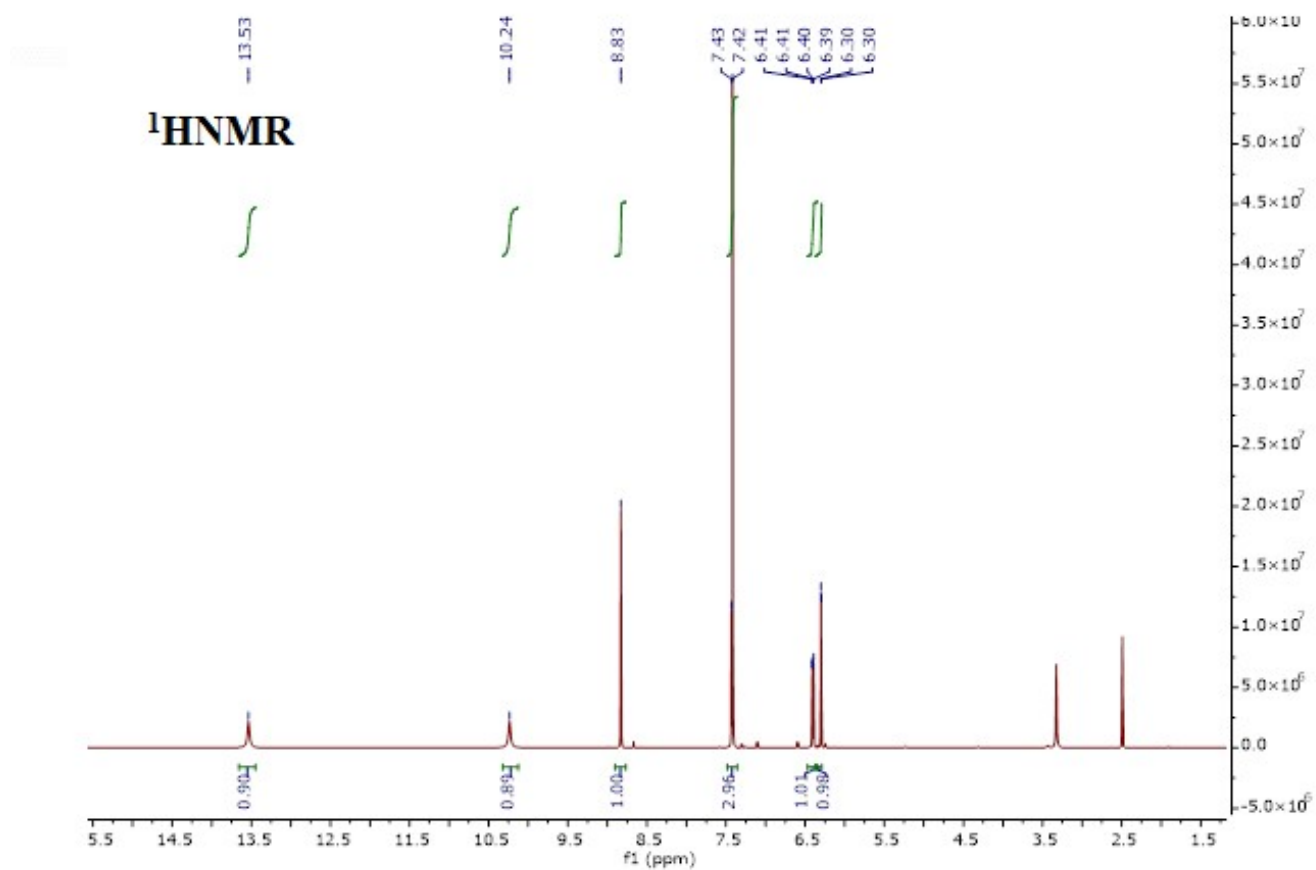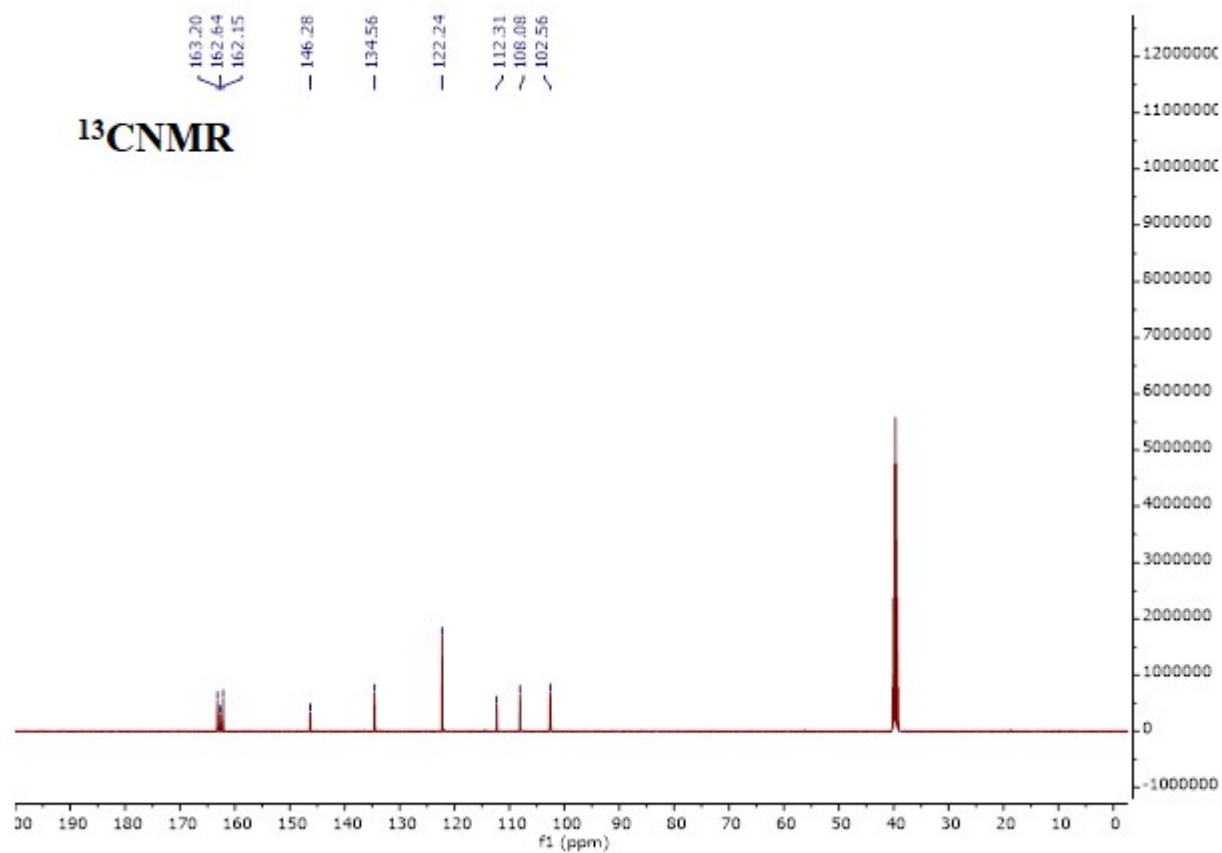

**Figure S9:** <sup>1</sup>H NMR and <sup>13</sup>C NMR spectral representation of **3c** compound



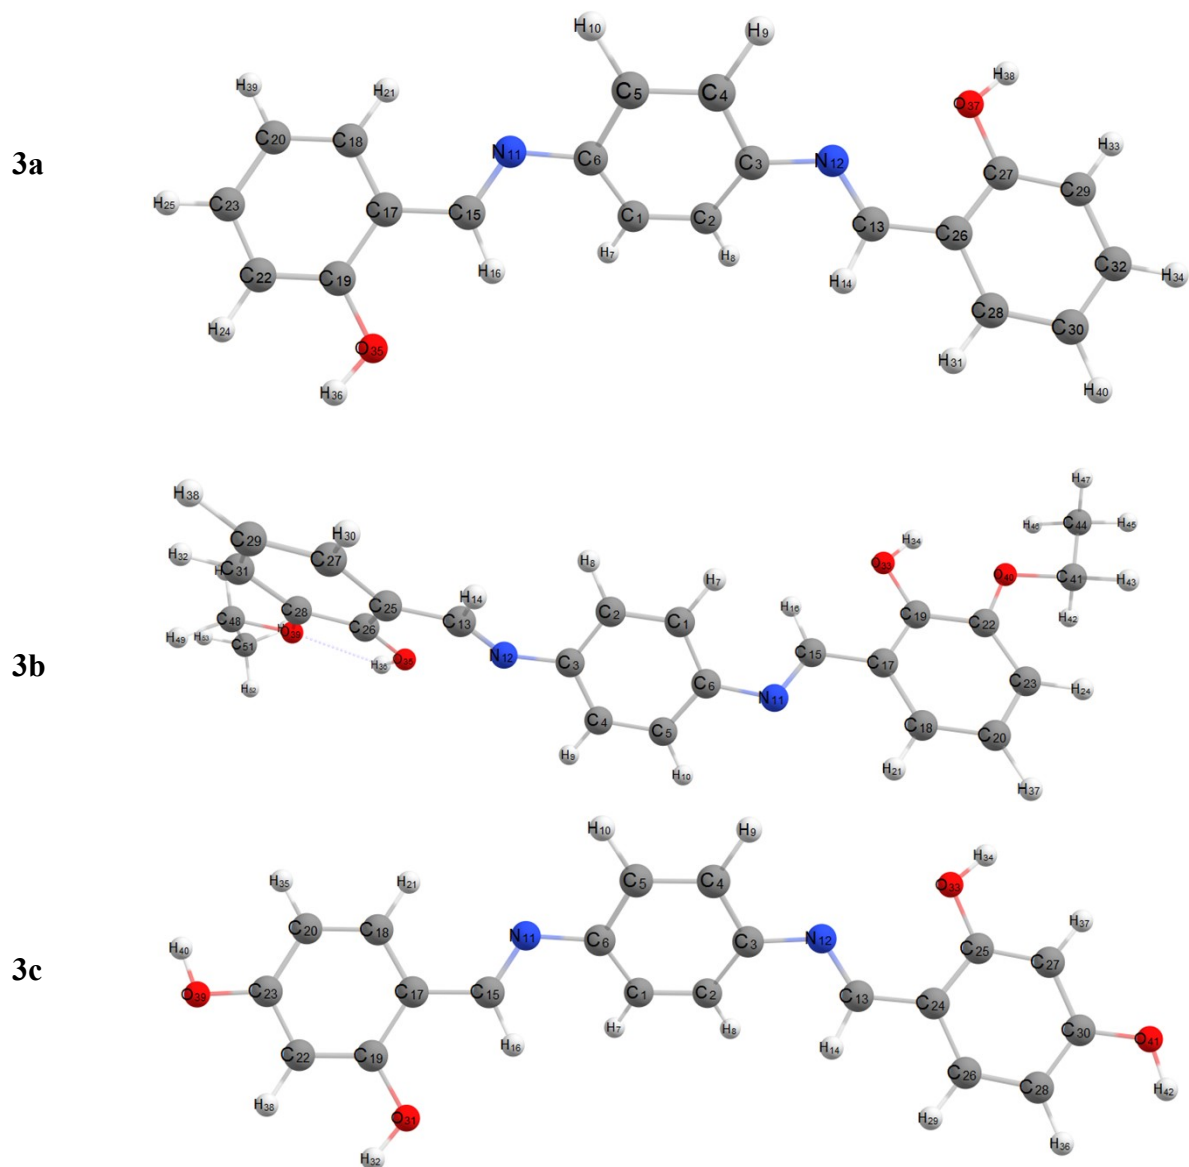

**Figure S10:** Optimized structures of studied compounds.

**Table S1:** Calculated energies ( $E$ ) and energy gap ( $\Delta E$ ) of HOMO-1, LUMO+1, HOMO-2 and LUMO+2 for **3a-3c**.

| Compound  | HOMO-1 | LUMO+1 | $\Delta E$ | HOMO-2 | LUMO+2 | $\Delta E$ |
|-----------|--------|--------|------------|--------|--------|------------|
| <b>3a</b> | -6.817 | -1.399 | 5.418      | -6.957 | -0.334 | 6.623      |
| <b>3b</b> | -6.425 | -1.340 | 5.085      | -6.475 | -0.326 | 6.149      |
| <b>3c</b> | -6.624 | -1.161 | 5.463      | -6.955 | -0.278 | 6.677      |

**Table S2:** Natural bond orbital (NBO) analysis of **3a**.

| Donor( $i$ ) | Type  | Acceptor( $j$ ) | Type    | $E(2)$<br>[kcal/mol] | $E(j)-E(i)$<br>[a.u.] | $F(i,j)$<br>[a.u.] |
|--------------|-------|-----------------|---------|----------------------|-----------------------|--------------------|
| C29-C32      | $\pi$ | C26-C27         | $\pi^*$ | 26.25                | 0.29                  | 0.081              |
| C28-C30      | $\pi$ | C29-C32         | $\pi^*$ | 25.89                | 0.3                   | 0.079              |
| C22-C23      | $\pi$ | C17-C19         | $\pi^*$ | 25.87                | 0.29                  | 0.08               |
| C18-C20      | $\pi$ | C22-C23         | $\pi^*$ | 25.85                | 0.29                  | 0.078              |
| C26-C27      | $\pi$ | C28-C30         | $\pi^*$ | 24.86                | 0.3                   | 0.079              |
| C17-C19      | $\pi$ | C18-C20         | $\pi^*$ | 24.11                | 0.31                  | 0.079              |
| C2-C3        | $\pi$ | C1-C6           | $\pi^*$ | 22.68                | 0.3                   | 0.074              |



|         |          |         |            |       |      |       |
|---------|----------|---------|------------|-------|------|-------|
| C18-C20 | $\pi$    | C17-C19 | $\pi^*$    | 17.73 | 0.29 | 0.066 |
| N12-C13 | $\pi$    | C2-C3   | $\pi^*$    | 10.62 | 0.38 | 0.062 |
| C1-C6   | $\pi$    | N11-C15 | $\pi^*$    | 8.61  | 0.3  | 0.048 |
| C2-C3   | $\pi$    | N12-C13 | $\pi^*$    | 8.22  | 0.3  | 0.047 |
| N11-C15 | $\pi$    | C17-C19 | $\pi^*$    | 7.57  | 0.37 | 0.052 |
| N12-C13 | $\pi$    | C26-C27 | $\pi^*$    | 7.09  | 0.37 | 0.05  |
| C17-C19 | $\pi$    | C17-C19 | $\pi^*$    | 1.97  | 0.29 | 0.022 |
| C26-C27 | $\pi$    | C26-C27 | $\pi^*$    | 1.95  | 0.29 | 0.021 |
| C19-C22 | $\sigma$ | C17-C19 | $\sigma^*$ | 5.29  | 1.29 | 0.074 |
| O37-H38 | $\sigma$ | C26-C27 | $\sigma^*$ | 5.21  | 1.31 | 0.074 |
| C27-C29 | $\sigma$ | C26-C27 | $\sigma^*$ | 5.15  | 1.28 | 0.073 |
| C18-H21 | $\sigma$ | C17-C19 | $\sigma^*$ | 4.95  | 1.08 | 0.065 |
| O35-H36 | $\sigma$ | C17-C19 | $\sigma^*$ | 4.82  | 1.32 | 0.072 |
| C28-H31 | $\sigma$ | C26-C27 | $\sigma^*$ | 4.79  | 1.08 | 0.064 |
| C13-H14 | $\sigma$ | C26-C27 | $\sigma^*$ | 4.76  | 1.09 | 0.065 |
| C1-C6   | $\sigma$ | C5-C6   | $\sigma^*$ | 4.7   | 1.29 | 0.069 |
| C2-C3   | $\sigma$ | C3-C4   | $\sigma^*$ | 4.68  | 1.29 | 0.069 |
| C15-C17 | $\sigma$ | C6-N11  | $\sigma^*$ | 4.65  | 1.14 | 0.065 |
| C27-C29 | $\sigma$ | C32-H34 | $\sigma^*$ | 2.15  | 1.15 | 0.044 |
| C23-H25 | $\sigma$ | C20-C23 | $\sigma^*$ | 0.64  | 1.11 | 0.024 |
| N11-C15 | $\sigma$ | C15-H16 | $\sigma^*$ | 0.62  | 1.26 | 0.025 |
| C15-H16 | $\sigma$ | N11-C15 | $\sigma^*$ | 0.6   | 1.15 | 0.024 |
| C22-H24 | $\sigma$ | C19-C22 | $\sigma^*$ | 0.6   | 1.1  | 0.023 |
| C27-C29 | $\sigma$ | O37-H38 | $\sigma^*$ | 0.57  | 1.14 | 0.023 |
| C29-H33 | $\sigma$ | C27-C29 | $\sigma^*$ | 0.57  | 1.09 | 0.022 |
| N12-C13 | $\sigma$ | C13-H14 | $\sigma^*$ | 0.56  | 1.26 | 0.024 |
| C19-C22 | $\sigma$ | C19-O35 | $\sigma^*$ | 0.56  | 1.09 | 0.022 |
| C27-C29 | $\sigma$ | C27-O37 | $\sigma^*$ | 0.54  | 1.1  | 0.022 |
| C19-C22 | $\sigma$ | O35-H36 | $\sigma^*$ | 0.52  | 1.14 | 0.022 |
| N12     | LP(1)    | C13-H14 | $\sigma^*$ | 13.09 | 0.72 | 0.088 |
| N11     | LP(1)    | C15-H16 | $\sigma^*$ | 12.45 | 0.73 | 0.087 |
| N11     | LP(1)    | C1-C6   | $\sigma^*$ | 6.97  | 0.93 | 0.073 |
| O35     | LP(1)    | C19-C22 | $\sigma^*$ | 6.35  | 1.19 | 0.078 |
| N12     | LP(1)    | C13-C26 | $\sigma^*$ | 2.5   | 0.85 | 0.042 |
| N11     | LP(1)    | C5-C6   | $\sigma^*$ | 0.81  | 0.94 | 0.025 |
| N12     | LP(1)    | C3-C4   | $\sigma^*$ | 0.71  | 0.93 | 0.024 |
| O37     | LP(2)    | C26-C27 | $\pi^*$    | 33.73 | 0.37 | 0.107 |
| O35     | LP(2)    | C17-C19 | $\pi^*$    | 31.62 | 0.37 | 0.105 |
| N12     | LP(1)    | C2-C3   | $\pi^*$    | 5.56  | 0.39 | 0.045 |
| N11     | LP(1)    | C1-C6   | $\pi^*$    | 4.61  | 0.39 | 0.041 |

**Table S3:** Natural bond orbital (NBO) analysis of **3b**.

| Donor( <i>i</i> ) | Type  | Acceptor( <i>j</i> ) | Type    | <i>E</i> (2)<br>[kcal/mol] | <i>E</i> ( <i>j</i> )- <i>E</i> ( <i>i</i> )<br>[a.u.] | <i>F</i> ( <i>i,j</i> )<br>[a.u.] |
|-------------------|-------|----------------------|---------|----------------------------|--------------------------------------------------------|-----------------------------------|
| C2-C3             | $\pi$ | C4-C51               | $\pi^*$ | 9.85                       | 0.3                                                    | 0.07                              |
| C25-C26           | $\pi$ | C28-C31              | $\pi^*$ | 9.6                        | 0.3                                                    | 0.068                             |
| C17-C19           | $\pi$ | N11-C15              | $\pi^*$ | 9.38                       | 0.31                                                   | 0.073                             |
| C17-C19           | $\pi$ | C22-C23              | $\pi^*$ | 9.33                       | 0.3                                                    | 0.068                             |
| C28-C31           | $\pi$ | C27-C29              | $\pi^*$ | 9.04                       | 0.32                                                   | 0.07                              |
| C22-C23           | $\pi$ | C18-C20              | $\pi^*$ | 8.83                       | 0.32                                                   | 0.07                              |

|         |          |         |            |      |      |       |
|---------|----------|---------|------------|------|------|-------|
| C1-C6   | $\pi$    | N11-C15 | $\pi^*$    | 8.45 | 0.3  | 0.047 |
| N11-C15 | $\pi$    | C1-C61  | $\pi^*$    | 0.76 | 0.38 | 0.062 |
| C27-C29 | $\pi$    | C28-C31 | $\pi^*$    | 0.66 | 0.29 | 0.071 |
| C28-C31 | $\pi$    | C25-C26 | $\pi^*$    | 0.61 | 0.31 | 0.073 |
| C18-C20 | $\pi$    | C22-C23 | $\pi^*$    | 0.46 | 0.29 | 0.071 |
| C22-C23 | $\pi$    | C17-C19 | $\pi^*$    | 0.39 | 0.31 | 0.073 |
| N12-C13 | $\pi$    | C2-C31  | $\pi^*$    | 0.36 | 0.38 | 0.061 |
| C1-C6   | $\pi$    | C4-C52  | $\pi^*$    | 0.02 | 0.3  | 0.071 |
| C26-C28 | $\sigma$ | C13-C25 | $\sigma^*$ | 3.49 | 1.22 | 0.058 |
| C26-C28 | $\sigma$ | C25-C26 | $\sigma^*$ | 5.04 | 1.28 | 0.072 |
| C26-C28 | $\sigma$ | C26-O35 | $\sigma^*$ | 0.5  | 1.09 | 0.021 |
| C26-C28 | $\sigma$ | C28-C31 | $\sigma^*$ | 5.1  | 1.3  | 0.073 |
| C26-C28 | $\sigma$ | C28-O39 | $\sigma^*$ | 0.81 | 1.09 | 0.026 |
| C26-C28 | $\sigma$ | C31-H32 | $\sigma^*$ | 2.31 | 1.13 | 0.046 |
| C26-C28 | $\sigma$ | O35-H36 | $\sigma^*$ | 0.62 | 1.14 | 0.024 |
| C26-C28 | $\sigma$ | O39-C48 | $\sigma^*$ | 3.89 | 1.01 | 0.056 |
| C26-O35 | $\sigma$ | C25-C26 | $\sigma^*$ | 1.86 | 1.52 | 0.048 |
| C26-O35 | $\sigma$ | C25-C27 | $\sigma^*$ | 1.54 | 1.52 | 0.043 |
| N11-C15 | $\sigma$ | N11-C15 | $\sigma^*$ | 0.69 | 0.58 | 0.062 |
| N12-C13 | $\sigma$ | N12-C13 | $\sigma^*$ | 0.77 | 0.58 | 0.064 |
| O40     | LP(2)    | C22-C23 | $\pi^*$    | 9.82 | 0.37 | 0.1   |
| O39     | LP(2)    | C28-C31 | $\pi^*$    | 9.35 | 0.37 | 0.099 |
| N12     | LP(1)    | C2-C3   | $\pi^*$    | 5.92 | 0.39 | 0.046 |
| N11     | LP(1)    | C1-C6   | $\pi^*$    | 5.13 | 0.39 | 0.043 |
| O35     | LP(2)    | C25-C26 | $\pi^*$    | 4    | 0.37 | 0.107 |
| O33     | LP(2)    | C17-C19 | $\pi^*$    | 1.99 | 0.37 | 0.105 |
| O40     | LP(1)    | C22-C23 | $\sigma^*$ | 7.19 | 1.16 | 0.082 |
| O39     | LP(1)    | C28-C31 | $\sigma^*$ | 7.06 | 1.16 | 0.081 |
| N11     | LP(1)    | C1-C6   | $\sigma^*$ | 6.77 | 0.94 | 0.072 |
| O40     | LP(1)    | C41-H43 | $\sigma^*$ | 0.63 | 0.95 | 0.022 |
| O40     | LP(1)    | C41-H42 | $\sigma^*$ | 0.62 | 0.95 | 0.022 |
| O39     | LP(1)    | C48-H49 | $\sigma^*$ | 0.61 | 0.95 | 0.022 |

**Table S4:** Natural bond orbital (NBO) analysis of **3c**.

| Donor( <i>i</i> ) | Type  | Acceptor( <i>j</i> ) | Type    | <i>E</i> (2)<br>[kcal/mol] | <i>E</i> ( <i>j</i> )- <i>E</i> ( <i>i</i> )<br>[a.u.] | <i>F</i> ( <i>i,j</i> )<br>[a.u.] |
|-------------------|-------|----------------------|---------|----------------------------|--------------------------------------------------------|-----------------------------------|
| C1-C6             | $\pi$ | C2-C3                | $\pi^*$ | 22.34                      | 0.3                                                    | 0.073                             |
| C1-C6             | $\pi$ | C4-C5                | $\pi^*$ | 20.06                      | 0.3                                                    | 0.071                             |
| C1-C6             | $\pi$ | N11-C15              | $\pi^*$ | 8.49                       | 0.3                                                    | 0.047                             |
| C2-C3             | $\pi$ | C1-C6                | $\pi^*$ | 22.62                      | 0.3                                                    | 0.074                             |
| C2-C3             | $\pi$ | C4-C5                | $\pi^*$ | 19.9                       | 0.3                                                    | 0.07                              |
| C2-C3             | $\pi$ | N12-C13              | $\pi^*$ | 8.2                        | 0.3                                                    | 0.047                             |
| C4-C5             | $\pi$ | C1-C6                | $\pi^*$ | 20.75                      | 0.3                                                    | 0.072                             |
| C17-C19           | $\pi$ | C18-C20              | $\pi^*$ | 27.76                      | 0.3                                                    | 0.083                             |
| C24-C26           | $\pi$ | C28-C30              | $\pi^*$ | 15.4                       | 0.28                                                   | 0.06                              |
| C25-C27           | $\pi$ | C24-C26              | $\pi^*$ | 13.61                      | 0.3                                                    | 0.059                             |
| C25-C27           | $\pi$ | C25-C27              | $\pi^*$ | 1.88                       | 0.3                                                    | 0.022                             |
| C25-C27           | $\pi$ | C28-C30              | $\pi^*$ | 29.06                      | 0.3                                                    | 0.085                             |
| C28-C30           | $\pi$ | C24-C26              | $\pi^*$ | 31.78                      | 0.3                                                    | 0.088                             |
| C28-C30           | $\pi$ | C25-C27              | $\pi^*$ | 14.99                      | 0.29                                                   | 0.059                             |

|         |          |         |            |       |      |       |
|---------|----------|---------|------------|-------|------|-------|
| C28-C30 | $\pi$    | C28-C30 | $\pi^*$    | 2.18  | 0.29 | 0.023 |
| C1-C2   | $\sigma$ | C1-C6   | $\sigma^*$ | 3.97  | 1.29 | 0.064 |
| C1-C2   | $\sigma$ | C1-H7   | $\sigma^*$ | 1.34  | 1.13 | 0.035 |
| C1-C2   | $\sigma$ | C2-C3   | $\sigma^*$ | 3.97  | 1.29 | 0.064 |
| C1-C2   | $\sigma$ | C2-H8   | $\sigma^*$ | 1.33  | 1.13 | 0.035 |
| C1-C2   | $\sigma$ | C3-N12  | $\sigma^*$ | 4.06  | 1.17 | 0.062 |
| C1-C2   | $\sigma$ | C6-N11  | $\sigma^*$ | 4.11  | 1.17 | 0.062 |
| C1-C6   | $\sigma$ | C1-C2   | $\sigma^*$ | 3.94  | 1.31 | 0.064 |
| C1-C6   | $\sigma$ | C1-H7   | $\sigma^*$ | 1.22  | 1.12 | 0.033 |
| C1-C6   | $\sigma$ | C2-H8   | $\sigma^*$ | 2.35  | 1.13 | 0.046 |
| C1-C6   | $\sigma$ | C5-C6   | $\sigma^*$ | 4.67  | 1.29 | 0.069 |
| C28-H36 | $\sigma$ | C28-C30 | $\sigma^*$ | 0.62  | 1.09 | 0.023 |
| C28-H36 | $\sigma$ | C30-O41 | $\sigma^*$ | 1.03  | 0.9  | 0.027 |
| C30-O41 | $\sigma$ | C25-C27 | $\sigma^*$ | 1.51  | 1.54 | 0.043 |
| C30-O41 | $\sigma$ | C26-C28 | $\sigma^*$ | 1.09  | 1.57 | 0.037 |
| C30-O41 | $\sigma$ | C27-C30 | $\sigma^*$ | 1.08  | 1.54 | 0.037 |
| C30-O41 | $\sigma$ | C28-C30 | $\sigma^*$ | 1.21  | 1.53 | 0.039 |
| O31-H32 | $\sigma$ | C17-C19 | $\sigma^*$ | 4.78  | 1.32 | 0.071 |
| O33-H34 | $\sigma$ | C24-C25 | $\sigma^*$ | 5.16  | 1.31 | 0.074 |
| O39-H40 | $\sigma$ | C22-C23 | $\sigma^*$ | 4.79  | 1.33 | 0.072 |
| O41-H42 | $\sigma$ | C27-C30 | $\sigma^*$ | 4.81  | 1.33 | 0.072 |
| N11     | LP(1)    | C1-C6   | $\sigma^*$ | 6.99  | 0.93 | 0.073 |
| N11     | LP(1)    | C5-C6   | $\sigma^*$ | 0.79  | 0.93 | 0.025 |
| O33     | LP(1)    | C25-C27 | $\sigma^*$ | 6.2   | 1.2  | 0.077 |
| O39     | LP(1)    | C20-C23 | $\sigma^*$ | 6.54  | 1.19 | 0.079 |
| O41     | LP(1)    | C28-C30 | $\sigma^*$ | 6.59  | 1.19 | 0.079 |
| N11     | LP(1)    | C1-C6   | $\pi^*$    | 4.65  | 0.39 | 0.041 |
| N12     | LP(1)    | C2-C3   | $\pi^*$    | 5.52  | 0.39 | 0.044 |
| O31     | LP(2)    | C17-C19 | $\pi^*$    | 32.5  | 0.37 | 0.107 |
| O33     | LP(2)    | C25-C27 | $\pi^*$    | 35.86 | 0.37 | 0.109 |
| O39     | LP(2)    | C22-C23 | $\pi^*$    | 33.92 | 0.37 | 0.107 |
| O41     | LP(2)    | C28-C30 | $\pi^*$    | 33.75 | 0.37 | 0.107 |

**Table S5:** Wavelength, excitation energy and oscillator strength of investigated compound **3a** at M06/6-311G(d,p) in solvent phase.

| NO | DFT $\lambda$ (nm) | $E$ (eV) | $f_{os}$ | MO contributions                                                                                                                                                                                                                                                                                        |
|----|--------------------|----------|----------|---------------------------------------------------------------------------------------------------------------------------------------------------------------------------------------------------------------------------------------------------------------------------------------------------------|
| 1  | 384.757            | 3.222    | 1.104    | H $\rightarrow$ L (94%),                                                                                                                                                                                                                                                                                |
| 2  | 326.652            | 3.796    | 0.010    | H $\rightarrow$ L+1 (79%), H-6 $\rightarrow$ L (8%), H-5 $\rightarrow$ L+1 (3%), H-4 $\rightarrow$ L (4%)                                                                                                                                                                                               |
| 3  | 306.497            | 4.045    | 0.072    | H-2 $\rightarrow$ L (35%), H-1 $\rightarrow$ L (46%), H-2 $\rightarrow$ L+1 (8%), H-1 $\rightarrow$ L+1 (2%)                                                                                                                                                                                            |
| 4  | 302.305            | 4.101    | 0.119    | H-2 $\rightarrow$ L (38%), H-1 $\rightarrow$ L (35%), H-1 $\rightarrow$ L+1 (10%), H-6 $\rightarrow$ L+1 (2%), H-2 $\rightarrow$ L+1 (5%)                                                                                                                                                               |
| 5  | 282.469            | 4.389    | 0.006    | H-5 $\rightarrow$ L (10%), H-4 $\rightarrow$ L (46%), H $\rightarrow$ L+2 (19%), H-6 $\rightarrow$ L (6%), H $\rightarrow$ L+1 (9%)                                                                                                                                                                     |
| 6  | 278.779            | 4.447    | 0.262    | H-5 $\rightarrow$ L (25%), H-4 $\rightarrow$ L (12%), H-3 $\rightarrow$ L (17%), H-7 $\rightarrow$ L (5%), H-6 $\rightarrow$ L (7%), H-6 $\rightarrow$ L+1 (6%), H-4 $\rightarrow$ L+1 (3%), H-3 $\rightarrow$ L+1 (5%), H-2 $\rightarrow$ L (3%), H-1 $\rightarrow$ L+1 (3%), H $\rightarrow$ L+2 (5%) |

MO=molecular orbital, H=HOMO, L=LUMO,  $f_{os}$  = oscillator strength, wavelength=  $\lambda$  (nm)

**Table S6:** Wavelength, excitation energy and oscillator strength of investigated compound **3b** at M06/6-311G(d,p) in solvent phase.

| NO | DFT $\lambda$ (nm) | $E$ (eV) | $f_{os}$ | MO contributions                                                                                                    |
|----|--------------------|----------|----------|---------------------------------------------------------------------------------------------------------------------|
| 1  | 378.635            | 3.275    | 1.234    | H→L (93%)                                                                                                           |
| 2  | 330.722            | 3.749    | 0.047    | H-2→L (29%), H-1→L (52%), H-2→L+1 (9%), H→L+1 (7%)                                                                  |
| 3  | 327.256            | 3.789    | 0.041    | H-2→L (53%), H-1→L (27%), H-1→L+1 (13%),                                                                            |
| 4  | 323.204            | 3.836    | 0.002    | H→L+1 (68%), H-6→L (8%), H-5→L (4%), H-4→L+1 (5%), H-2→L+1 (5%), H-1→L (4%)                                         |
| 5  | 284.648            | 4.356    | 0.436    | H-6→L+1 (10%), H-4→L (52%), H-7→L (9%), H-5→L (5%), H-5→L+1 (4%), H-3→L (7%), H-3→L+1 (5%)                          |
| 6  | 282.000            | 4.397    | 0.026    | H-5→L (42%), H→L+1 (16%), H→L+2 (11%), H-6→L (6%), H-4→L (7%), H-4→L+1 (3%), H-2→L+1 (4%), H-1→L (3%), H-1→L+1 (2%) |

MO=molecular orbital, H=HOMO, L=LUMO,  $f_{os}$  = oscillator strength, wavelength=  $\lambda$  (nm)

**Table S7:** Wavelength, excitation energy and oscillator strength of investigated compound **3c** at M06/6-311G(d,p) in solvent phase.

| NO | DFT $\lambda$ (nm) | $E$ (eV) | $f_{os}$ | MO contributions                                                                                       |
|----|--------------------|----------|----------|--------------------------------------------------------------------------------------------------------|
| 1  | 382.172            | 3.244    | 1.332    | H→L (94%),                                                                                             |
| 2  | 319.926            | 3.875    | 0.012    | H→L+1 (80%), H-6→L (7%), H-5→L (3%), H-2→L+1 (4%)                                                      |
| 3  | 298.664            | 4.151    | 0.090    | H-2→L (21%), H-1→L (59%), H-3→L (3%), H-2→L+1 (4%)                                                     |
| 4  | 292.913            | 4.233    | 0.230    | H-2→L (50%), H-1→L (23%), H-7→L (4%), H-6→L+1 (4%), H-2→L+1 (3%), H-1→L+1 (5%)                         |
| 5  | 279.988            | 4.428    | 0.006    | H-5→L (43%), H→L+2 (44%), H→L+1 (4%)                                                                   |
| 6  | 276.417            | 4.485    | 0.100    | H-4→L (55%), H-3→L+1 (11%), H-7→L (3%), H-3→L (6%), H-1→L+1 (3%), H-1→L+4 (3%), H→L+3 (4%), H→L+4 (5%) |

MO=molecular orbital, H=HOMO, L=LUMO,  $f_{os}$  = oscillator strength, wavelength=  $\lambda$  (nm)

**Table S8:** Dipole polarizability and major contributing tensor (*e.s.u.*) of **3a-3c**

| Dipole moment    |                        |                        |                        |
|------------------|------------------------|------------------------|------------------------|
|                  | <b>3a</b>              | <b>3b</b>              | <b>3c</b>              |
| $\mu_x$          | 0.3510                 | -0.1877                | 0.0997                 |
| $\mu_y$          | 4.4568                 | 4.2557                 | 4.7915                 |
| $\mu_z$          | 0.0940                 | 0.1085                 | 0.0158                 |
| $\mu_{total}$    | 4.4716                 | 4.2612                 | 4.7926                 |
| Polarizability   |                        |                        |                        |
| $\alpha_{xx}$    | $1.02 \times 10^{-22}$ | $1.15 \times 10^{-22}$ | $1.10 \times 10^{-22}$ |
| $\alpha_{yy}$    | $5.12 \times 10^{-23}$ | $5.30 \times 10^{-23}$ | $5.17 \times 10^{-23}$ |
| $\alpha_{zz}$    | $2.16 \times 10^{-23}$ | $4.10 \times 10^{-23}$ | $2.24 \times 10^{-23}$ |
| $\alpha_{total}$ | $5.83 \times 10^{-23}$ | $6.99 \times 10^{-23}$ | $6.16 \times 10^{-23}$ |

| 2 <sup>nd</sup> Hyper pol.       |                        |                        |                        |  |
|----------------------------------|------------------------|------------------------|------------------------|--|
| $\gamma_X$                       | $7.16 \times 10^{-34}$ | $7.42 \times 10^{-34}$ | $8.13 \times 10^{-34}$ |  |
| $\gamma_Y$                       | $1.11 \times 10^{-35}$ | $1.79 \times 10^{-35}$ | $1.08 \times 10^{-35}$ |  |
| $\gamma_Z$                       | $9.17 \times 10^{-37}$ | $8.22 \times 10^{-36}$ | $1.00 \times 10^{-36}$ |  |
| Average $\langle \gamma \rangle$ | $7.28 \times 10^{-34}$ | $7.68 \times 10^{-34}$ | $8.24 \times 10^{-34}$ |  |
| Magnitude of $\gamma$            | $7.16 \times 10^{-34}$ | $7.42 \times 10^{-34}$ | $8.13 \times 10^{-34}$ |  |

**Table S9:** Frequency dependent Second hyperpolarizability (*e.s.u.*) of **3a-3c**

| Parameters                            | Frequency $\omega$ | <b>3a</b>              | <b>3b</b>              | <b>3c</b>              |
|---------------------------------------|--------------------|------------------------|------------------------|------------------------|
| $\gamma(-\omega, \omega, 0, 0)$       | 0.000              | $7.28 \times 10^{-34}$ | $7.68 \times 10^{-34}$ | $8.24 \times 10^{-34}$ |
|                                       | 1907.21nm          | $6.26 \times 10^{-34}$ | $6.80 \times 10^{-34}$ | $7.12 \times 10^{-34}$ |
| $\gamma(-2\omega, \omega, \omega, 0)$ | 0.000              | $7.28 \times 10^{-34}$ | $7.68 \times 10^{-34}$ | $8.24 \times 10^{-34}$ |
|                                       | 1907.21nm          | $6.80 \times 10^{-34}$ | $7.45 \times 10^{-34}$ | $7.76 \times 10^{-34}$ |

**Table S10:** The computed first hyperpolarizability ( $\beta_{tot}$ ) and major contributing tensors (*e.s.u.*) of **3a-3c**

| Polarizability  | <b>3a</b>               | <b>3b</b>               | <b>3c</b>               |
|-----------------|-------------------------|-------------------------|-------------------------|
| $\beta_{xxx}$   | $8.48 \times 10^{-30}$  | $8.57 \times 10^{-30}$  | $3.76 \times 10^{-30}$  |
| $\beta_{xxy}$   | $-9.09 \times 10^{-30}$ | $-3.28 \times 10^{-30}$ | $-8.23 \times 10^{-31}$ |
| $\beta_{xyy}$   | $-1.00 \times 10^{-30}$ | $-2.96 \times 10^{-30}$ | $6.33 \times 10^{-31}$  |
| $\beta_{yyy}$   | $-1.58 \times 10^{-30}$ | $3.03 \times 10^{-30}$  | $-3.07 \times 10^{-30}$ |
| $\beta_{xxz}$   | $4.26 \times 10^{-30}$  | $4.77 \times 10^{-30}$  | $4.42 \times 10^{-30}$  |
| $\beta_{yyz}$   | $2.12 \times 10^{-31}$  | $1.93 \times 10^{-30}$  | $1.11 \times 10^{-30}$  |
| $\beta_{xzz}$   | $-6.47 \times 10^{-32}$ | $1.22 \times 10^{-30}$  | $-8.41 \times 10^{-32}$ |
| $\beta_{yzz}$   | $-1.09 \times 10^{-31}$ | $-1.33 \times 10^{-30}$ | $-5.51 \times 10^{-32}$ |
| $\beta_{zzz}$   | $-8.59 \times 10^{-32}$ | $3.49 \times 10^{-30}$  | $-8.38 \times 10^{-32}$ |
| $\beta_{total}$ | $1.40 \times 10^{-30}$  | $1.23 \times 10^{-30}$  | $8.00 \times 10^{-30}$  |

**Table S11:** Frequency dependent First hyperpolarizability (*e.s.u.*) of **3a-3c**

|          | Parameters                          | Frequency $\omega$ | <b>3a</b>              | <b>3b</b>              | <b>3c</b>              |
|----------|-------------------------------------|--------------------|------------------------|------------------------|------------------------|
| Static   | $\beta(-\omega; \omega, 0)$         | 0.000              | $1.40 \times 10^{-29}$ | $1.23 \times 10^{-29}$ | $8.00 \times 10^{-30}$ |
|          | $\beta(-2, \omega; \omega, \omega)$ | 0.000              | $1.40 \times 10^{-29}$ | $1.23 \times 10^{-29}$ | $8.00 \times 10^{-30}$ |
| Specific | $\beta(-\omega; \omega, 0)$         | 1907.21nm          | $5.05 \times 10^{-23}$ | $6.14 \times 10^{-23}$ | $5.36 \times 10^{-23}$ |
|          | $\beta(-2\omega; \omega, \omega)$   | 1907.21nm          | $5.05 \times 10^{-23}$ | $6.14 \times 10^{-23}$ | $5.36 \times 10^{-23}$ |

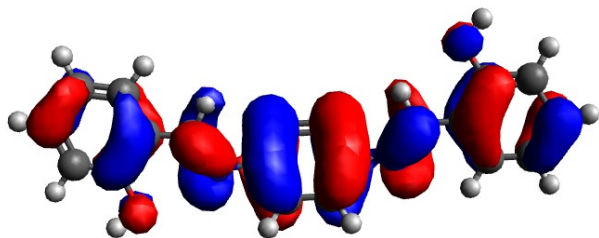

HOMO

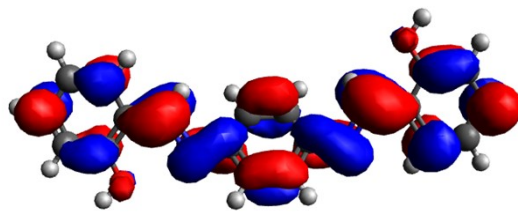

LUMO

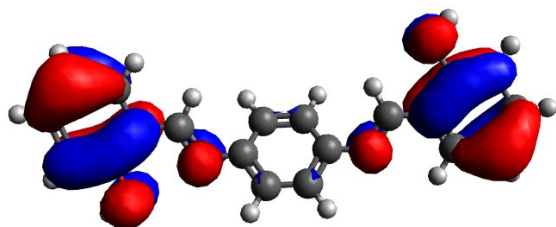

HOMO -1

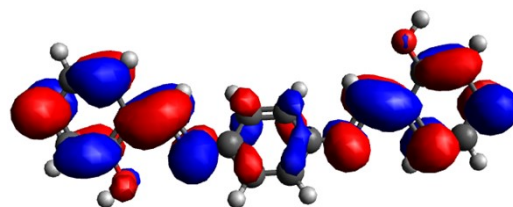

LUMO +1

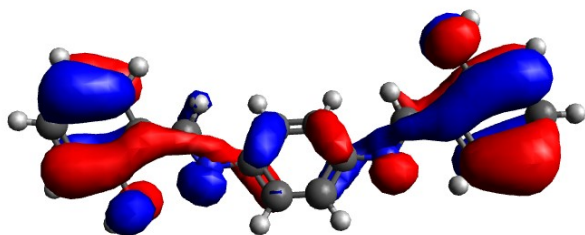

HOMO -2

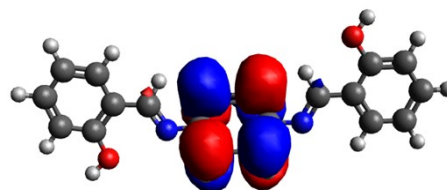

LUMO +2

(3a)

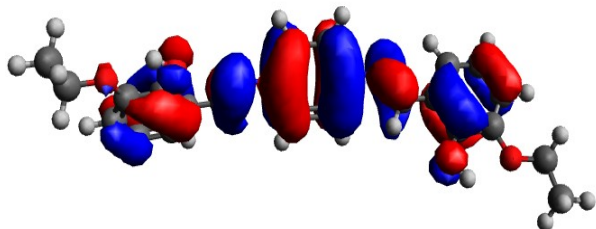

HOMO

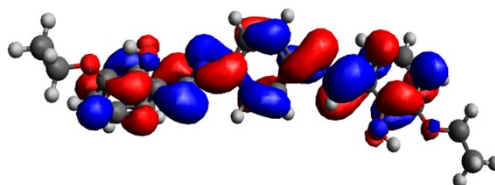

LUMO

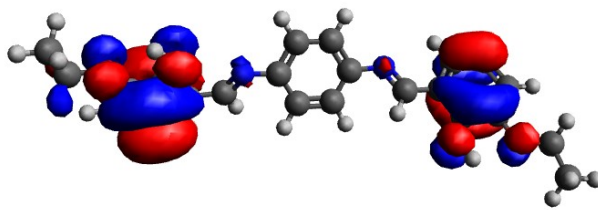

HOMO -1

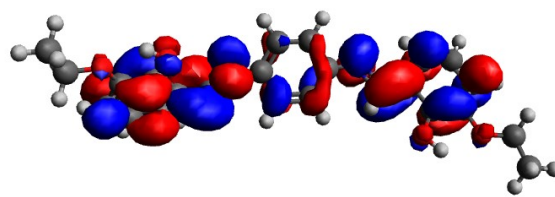

LUMO +1

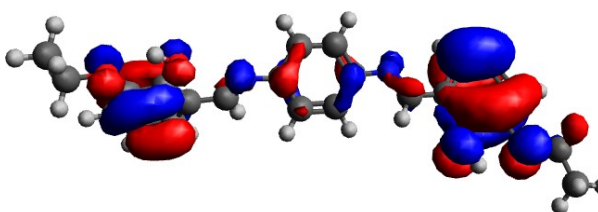

HOMO -2

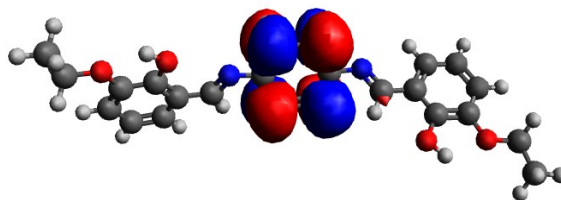

LUMO +2

(3b)

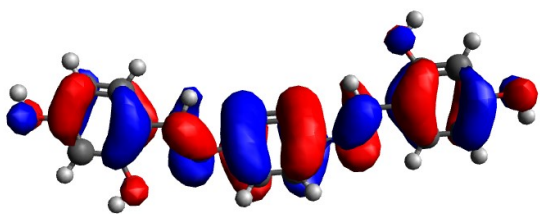

HOMO

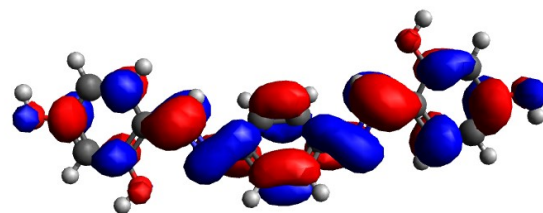

LUMO

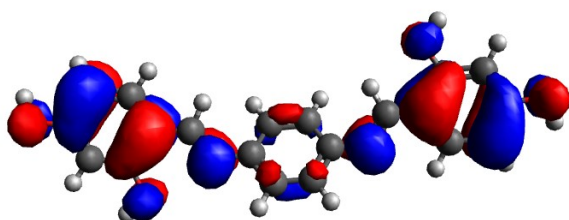

HOMO -1

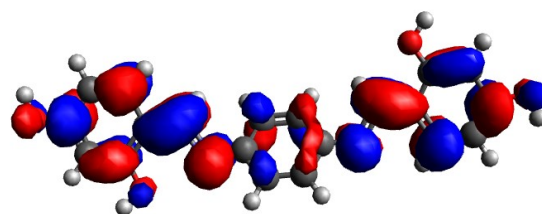

LUMO +1



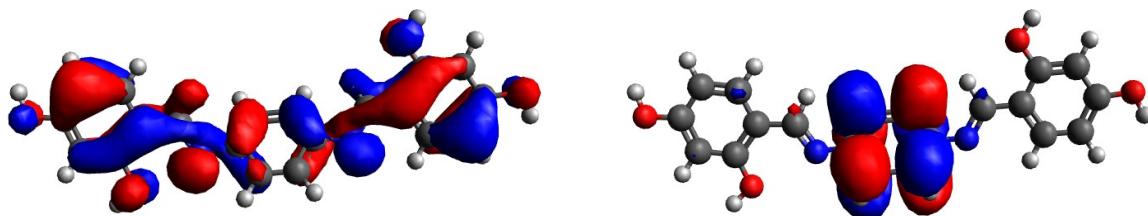

HOMO -2

LUMO +2

(3c)

Figure S11: The MO surfaces of 3a-3c

Table S11: Cartesian coordinates of 3c compound.

| Atom | X-axis   | Y-axis   | Z-axis   |
|------|----------|----------|----------|
| C    | -0.70891 | 0.194841 | 0.715019 |
| C    | 0.675732 | 0.230824 | 0.715565 |
| C    | 1.415265 | -0.73314 | 0.023314 |
| C    | 0.725912 | -1.76124 | -0.62836 |
| C    | -0.6536  | -1.79609 | -0.62976 |
| C    | -1.39646 | -0.80534 | 0.021195 |
| H    | -1.26452 | 0.926939 | 1.294091 |
| H    | 1.192898 | 0.990609 | 1.294728 |
| H    | 1.303507 | -2.52901 | -1.13439 |
| H    | -1.18985 | -2.5922  | -1.13766 |
| N    | -2.79105 | -0.91421 | -0.00276 |
| N    | 2.813734 | -0.76859 | 0.007152 |
| C    | 3.458691 | 0.327179 | -0.08126 |
| H    | 2.925744 | 1.285981 | -0.20534 |
| C    | -3.50793 | 0.140965 | -0.03699 |
| H    | -3.0609  | 1.141791 | -0.10731 |
| C    | -4.96439 | 0.091027 | -0.0049  |
| C    | -5.64402 | -1.12529 | 0.11108  |
| C    | -5.71568 | 1.274331 | -0.09305 |
| C    | -7.0233  | -1.18037 | 0.138096 |
| H    | -5.0461  | -2.02877 | 0.178504 |
| C    | -7.10711 | 1.220997 | -0.0642  |
| C    | -7.7535  | 0.002583 | 0.049787 |
| H    | -7.67658 | 2.144285 | -0.13315 |

|   |          |          |          |
|---|----------|----------|----------|
| H | -8.83848 | -0.02345 | 0.070431 |
| C | 4.907235 | 0.477992 | -0.05965 |
| C | 5.833434 | -0.57048 | 0.1163   |
| C | 5.408174 | 1.775414 | -0.22784 |
| C | 7.19827  | -0.28982 | 0.113287 |
| C | 6.761666 | 2.051769 | -0.22907 |
| H | 4.692145 | 2.582568 | -0.36124 |
| C | 7.659108 | 1.004295 | -0.05714 |
| H | 7.900988 | -1.10878 | 0.248494 |
| H | 8.72794  | 1.193225 | -0.05438 |
| O | -5.04698 | 2.441549 | -0.20514 |
| H | -5.6695  | 3.174856 | -0.25119 |
| O | 5.385803 | -1.82639 | 0.286512 |
| H | 6.138842 | -2.41692 | 0.401776 |
| H | -7.53321 | -2.13336 | 0.228217 |
| H | 7.116101 | 3.06778  | -0.36186 |

**Table S12:** Cartesian coordinates of **3e** compound.

| <b>Atom</b> | <b>X-axis</b> | <b>Y-axis</b> | <b>Z-axis</b> |
|-------------|---------------|---------------|---------------|
| C           | -0.7553       | 0.191977      | -0.60908      |
| C           | 0.611844      | 0.397599      | -0.53493      |
| C           | 1.470136      | -0.63908      | -0.15523      |
| C           | 0.915147      | -1.88383      | 0.159607      |
| C           | -0.44391      | -2.09834      | 0.050755      |
| C           | -1.30609      | -1.05845      | -0.31251      |
| H           | -1.40449      | 1.004351      | -0.92365      |
| H           | 1.020977      | 1.380029      | -0.75387      |
| H           | 1.582596      | -2.68293      | 0.468132      |
| H           | -0.87286      | -3.07225      | 0.267276      |
| N           | -2.67418      | -1.33835      | -0.39421      |
| N           | 2.855525      | -0.48828      | -0.03766      |
| C           | 3.478291      | 0.215548      | -0.89862      |
| H           | 2.946644      | 0.651345      | -1.76211      |
| C           | -3.52261      | -0.45056      | -0.04788      |
| H           | -3.20946      | 0.513589      | 0.375935      |

|   |          |          |          |
|---|----------|----------|----------|
| C | -4.95951 | -0.65611 | -0.17228 |
| C | -5.48809 | -1.83503 | -0.7225  |
| C | -5.83651 | 0.336371 | 0.262167 |
| C | -6.84743 | -2.01133 | -0.83204 |
| H | -4.79136 | -2.59663 | -1.05596 |
| C | -7.22645 | 0.151912 | 0.145367 |
| C | -7.72865 | -1.01475 | -0.39744 |
| H | -8.79853 | -1.16308 | -0.48945 |
| C | 4.902968 | 0.518146 | -0.88996 |
| C | 5.801654 | 0.091747 | 0.093722 |
| C | 5.395372 | 1.29715  | -1.95288 |
| C | 7.160302 | 0.450783 | -0.00294 |
| C | 6.72413  | 1.642691 | -2.03985 |
| H | 4.694592 | 1.626446 | -2.715   |
| C | 7.619544 | 1.217515 | -1.05684 |
| H | 8.666724 | 1.489346 | -1.12386 |
| O | -5.36641 | 1.480408 | 0.796275 |
| H | -6.1277  | 2.031191 | 1.027582 |
| O | 5.411801 | -0.65502 | 1.13822  |
| H | 6.19977  | -0.81856 | 1.67774  |
| H | -7.24936 | -2.92449 | -1.25782 |
| H | 7.083457 | 2.244307 | -2.86736 |
| O | 7.91103  | -0.02928 | 1.01976  |
| O | -7.94852 | 1.201904 | 0.607342 |
| C | -9.36989 | 1.135457 | 0.536715 |
| H | -9.72045 | 0.26469  | 1.107734 |
| H | -9.67417 | 0.998332 | -0.51011 |
| C | -9.9135  | 2.416755 | 1.102182 |
| H | -11.0055 | 2.409324 | 1.067674 |
| H | -9.60206 | 2.541951 | 2.142762 |
| H | -9.55601 | 3.274744 | 0.526389 |
| C | 9.302608 | 0.273948 | 1.050032 |
| H | 9.777632 | -0.11301 | 0.138066 |
| H | 9.435266 | 1.36451  | 1.064221 |
| C | 9.879844 | -0.36417 | 2.281584 |

---

|   |          |          |          |
|---|----------|----------|----------|
| H | 9.739466 | -1.44819 | 2.256373 |
| H | 10.95064 | -0.15659 | 2.345501 |
| H | 9.398014 | 0.028299 | 3.181176 |

**Table S13** Cartesian coordinates of **3g** compound.

| Atom | X-axis   | Y-axis   | Z-axis   |
|------|----------|----------|----------|
| C    | -0.70365 | 0.124003 | 0.715911 |
| C    | 0.681714 | 0.134914 | 0.717512 |
| C    | 1.406103 | -0.83733 | 0.020303 |
| C    | 0.696529 | -1.84866 | -0.63676 |
| C    | -0.68358 | -1.85865 | -0.63916 |
| C    | -1.41076 | -0.85866 | 0.016082 |
| H    | -1.24588 | 0.863027 | 1.299126 |
| H    | 1.211514 | 0.882144 | 1.301828 |
| H    | 1.260006 | -2.62382 | -1.14779 |
| H    | -1.23325 | -2.64193 | -1.15299 |
| N    | -2.80689 | -0.93932 | -0.01074 |
| N    | 2.803313 | -0.89719 | 0.003599 |
| C    | 3.466426 | 0.190822 | -0.07338 |
| H    | 2.94521  | 1.157487 | -0.19017 |
| C    | -3.4993  | 0.134606 | -0.04356 |
| H    | -3.02416 | 1.12294  | -0.11311 |
| C    | -4.95063 | 0.129893 | -0.01213 |
| C    | -5.67355 | -1.06106 | 0.107081 |
| C    | -5.67522 | 1.332728 | -0.10563 |
| C    | -7.05033 | -1.08315 | 0.132472 |
| H    | -5.10821 | -1.98487 | 0.179368 |
| C    | -7.06262 | 1.325821 | -0.08093 |
| C    | -7.7494  | 0.123641 | 0.036419 |
| C    | 4.911109 | 0.326993 | -0.04816 |
| C    | 5.835806 | -0.72842 | 0.121737 |
| C    | 5.432461 | 1.617296 | -0.20622 |
| C    | 7.198787 | -0.46691 | 0.12219  |
| C    | 6.784023 | 1.888061 | -0.20542 |
| H    | 4.729933 | 2.436675 | -0.335   |

|   |          |          |          |
|---|----------|----------|----------|
| C | 7.675973 | 0.828457 | -0.04002 |
| O | -4.97599 | 2.479731 | -0.21991 |
| H | -5.57686 | 3.230812 | -0.26865 |
| O | 5.377675 | -1.98003 | 0.283838 |
| H | 6.124103 | -2.57951 | 0.396002 |
| H | -7.59396 | -2.01875 | 0.226808 |
| H | 7.153307 | 2.901654 | -0.32996 |
| H | 7.912073 | -1.27704 | 0.250634 |
| H | -7.62536 | 2.25223  | -0.15431 |
| O | -9.0938  | 0.184123 | 0.052654 |
| H | -9.46178 | -0.7028  | 0.131136 |
| O | 9.010998 | 0.994388 | -0.02727 |
| H | 9.227852 | 1.925239 | -0.14744 |

---
